# Supplementary material
Source: PubMed Central journal article supplement (PMC3406605)
Supplement: NIHMS381238-supplement-Supporting_Information_Cover.pdf [file NIHMS381238-supplement-Supporting_Information_Cover.pdf]

Supporting Information

PRCA-2007-00114

Wojciech Rozek<sup>2,4</sup>, Jayme Horning<sup>1</sup>, James Anderson<sup>3</sup>, and Pawel Ciborowski<sup>1,2\*</sup>

**Sera Proteomic Biomarker Profiling in HIV-1 Infected Subjects with Cognitive Impairment**

Accompanying .xls file (Microsoft Excel) contains detailed information of results from MS/MS BioWorks 3.1. database searches of high confidence identified peptides as supplemental information to support Table 1.
